# Supplementary material for: Single-cell RNA sequencing of human breast tumour-infiltrating immune cells reveals a γδ T-cell subtype associated with good clinical outcome
Source: Life Sci Alliance. 2020 Dec 2;4(1):e202000680. doi: 10.26508/lsa.202000680 (PMC7723295; doi:10.26508/lsa.202000680)
Supplement: Supplementary file 6 [file LSA-2020-00680_TableS6.xlsx]

## Sheet: Table S6 BRCA gdT global
Table S6. Differentially expressed genes in γδ-T subtypes between all breast tumour infiltrating immune cells.
gene	p_val	avg_logFC	pct.1	pct.2	p_val_adj	cluster
A2M	1.27919e-84	1.20335	0.852	0.271	1.86442e-80	γδ-T.3
ZBTB16	3.83654e-77	1.08586	0.481	0.044	5.59176e-73	γδ-T.3
PLCB1	5.28414e-76	1.09212	0.878	0.31	7.70164e-72	γδ-T.3
PZP	7.80089e-64	1.05439	0.65	0.151	1.13698e-59	γδ-T.3
KLRB1	4.98984e-54	0.995126	0.705	0.22	7.2727e-50	γδ-T.3
IL12RB2	3.58866e-52	1.07065	0.751	0.288	5.23047e-48	γδ-T.3
CEBPD	7.24169e-41	0.832158	0.435	0.089	1.05548e-36	γδ-T.3
KLRD1	1.25623e-40	0.788384	0.515	0.133	1.83095e-36	γδ-T.3
RGS2	4.34032e-36	0.816087	0.819	0.507	6.32601e-32	γδ-T.3
CYTH3	5.24752e-36	0.877904	0.612	0.225	7.64826e-32	γδ-T.3
S100B	4.39622e-27	0.763227	0.219	0.028	6.40749e-23	γδ-T.3
GNLY	3.98269e-246	3.15922	0.979	0.219	5.80478e-242	γδ-T.2
ATP8B4	1.71237e-177	2.01794	0.813	0.041	2.49578e-173	γδ-T.2
NCAM1	1.47963e-163	1.9668	0.701	0.017	2.15655e-159	γδ-T.2
TYROBP	1.34658e-130	1.40533	0.85	0.081	1.96264e-126	γδ-T.2
PLCG2	6.43208e-124	2.02244	0.861	0.157	9.37476e-120	γδ-T.2
KLRD1	1.39866e-101	1.45214	0.775	0.128	2.03854e-97	γδ-T.2
NKG7	1.18602e-89	1.37024	0.947	0.498	1.72863e-85	γδ-T.2
CTSW	1.84635e-75	1.12843	0.872	0.424	2.69106e-71	γδ-T.2
RIN3	4.0976e-73	1.34982	0.727	0.196	5.97225e-69	γδ-T.2
SH2D1B	4.94541e-73	0.852113	0.316	0.004	7.20793e-69	γδ-T.2
KLRC1	7.99888e-73	1.19582	0.449	0.025	1.16584e-68	γδ-T.2
GZMB	5.04961e-70	1.6799	0.791	0.262	7.3598e-66	γδ-T.2
NCR1	1.74946e-68	0.735261	0.332	0.007	2.54984e-64	γδ-T.2
FCER1G	3.55627e-68	0.930034	0.54	0.06	5.18327e-64	γδ-T.2
CLNK	6.40937e-62	1.00231	0.348	0.014	9.34166e-58	γδ-T.2
MCTP2	1.88524e-61	1.1472	0.754	0.239	2.74773e-57	γδ-T.2
LINGO2	2.5704e-60	1.87758	0.332	0.015	3.74636e-56	γδ-T.2
HAVCR2	5.46794e-60	1.25309	0.513	0.078	7.96952e-56	γδ-T.2
NCALD	3.72505e-58	1.15806	0.818	0.325	5.42926e-54	γδ-T.2
CD7	2.20442e-57	1.03527	0.797	0.396	3.21294e-53	γδ-T.2
KLRF1	1.75514e-55	0.929166	0.396	0.029	2.55811e-51	γδ-T.2
B3GNT7	2.24133e-53	0.750247	0.273	0.007	3.26675e-49	γδ-T.2
CNOT2	6.02899e-51	1.14515	0.872	0.613	8.78725e-47	γδ-T.2
CD63	1.11533e-50	0.939004	0.802	0.312	1.62559e-46	γδ-T.2
KLRK1	1.15534e-48	0.822247	0.968	0.539	1.68391e-44	γδ-T.2
DOCK5	4.36666e-48	1.09663	0.535	0.1	6.36441e-44	γδ-T.2
PRF1	7.60461e-48	1.06034	0.658	0.216	1.10837e-43	γδ-T.2
GOLIM4	1.87668e-45	0.77323	0.358	0.037	2.73527e-41	γδ-T.2
GAS7	6.99498e-45	1.10026	0.69	0.222	1.01952e-40	γδ-T.2
APBA2	1.39442e-42	1.02701	0.572	0.147	2.03236e-38	γδ-T.2
PRKX	2.56091e-42	0.837511	0.904	0.577	3.73253e-38	γδ-T.2
VAV3	2.95398e-41	1.04271	0.604	0.167	4.30543e-37	γδ-T.2
LYN	3.52458e-41	0.857273	0.401	0.053	5.13708e-37	γδ-T.2
HSH2D	9.1811e-41	0.974521	0.417	0.083	1.33815e-36	γδ-T.2
PDGFD	7.28771e-40	1.05732	0.439	0.071	1.06218e-35	γδ-T.2
ABCB1	2.59901e-39	0.908669	0.503	0.106	3.78805e-35	γδ-T.2
SAMD3	5.55473e-39	0.839664	0.818	0.438	8.09602e-35	γδ-T.2
TXK	1.12894e-38	0.887189	0.337	0.039	1.64543e-34	γδ-T.2
HOPX	1.75029e-38	0.968852	0.556	0.193	2.55105e-34	γδ-T.2
GEM	7.83505e-38	1.12024	0.374	0.055	1.14196e-33	γδ-T.2
GALNT2	8.87575e-38	0.914002	0.652	0.263	1.29364e-33	γδ-T.2
PPP1R9A	2.47399e-37	0.712287	0.16	0.002	3.60585e-33	γδ-T.2
ADAM28	3.11409e-37	0.803497	0.289	0.024	4.53878e-33	γδ-T.2
SRGAP3	5.01913e-34	0.883658	0.455	0.106	7.31539e-30	γδ-T.2
ABHD2	8.79219e-34	0.846265	0.439	0.11	1.28146e-29	γδ-T.2
AHI1	4.68189e-33	0.892186	0.765	0.429	6.82385e-29	γδ-T.2
ITGB1	1.12392e-32	0.789633	0.749	0.412	1.63812e-28	γδ-T.2
PDE7B	2.87185e-32	1.13992	0.257	0.037	4.18572e-28	γδ-T.2
ZNF683	1.31202e-30	0.791535	0.455	0.11	1.91226e-26	γδ-T.2
PIK3AP1	1.75077e-30	0.879536	0.449	0.114	2.55175e-26	γδ-T.2
LARGE	4.08489e-30	0.912231	0.316	0.047	5.95372e-26	γδ-T.2
LDB2	2.49969e-28	0.758689	0.166	0.006	3.64329e-24	γδ-T.2
IFITM2	6.28443e-28	0.705638	0.738	0.438	9.15955e-24	γδ-T.2
ITGA1	4.48385e-27	0.760282	0.807	0.446	6.53521e-23	γδ-T.2
LOC374443	2.23049e-25	0.705029	0.433	0.163	3.25094e-21	γδ-T.2
L3MBTL4	1.70944e-24	0.799516	0.305	0.063	2.49152e-20	γδ-T.2
AGPAT4	4.33896e-23	0.737728	0.684	0.35	6.32404e-19	γδ-T.2
KCNQ5	7.77811e-22	0.966999	0.38	0.102	1.13366e-17	γδ-T.2
CMC1	3.89156e-20	0.958731	0.417	0.222	5.67195e-16	γδ-T.2
DAPK2	2.24844e-18	0.777238	0.401	0.139	3.2771e-14	γδ-T.2
ABTB2	1.02284e-10	0.851577	0.39	0.252	1.49079e-06	γδ-T.2
FGFBP2	9.65821e-87	2.04348	0.852	0.013	1.40768e-82	γδ-T.1
PRF1	8.50746e-53	1.72387	0.885	0.225	1.23996e-48	γδ-T.1
RAP1GAP2	1.20469e-52	1.71919	0.738	0.035	1.75584e-48	γδ-T.1
NKG7	1.02221e-43	1.49722	1	0.509	1.48987e-39	γδ-T.1
GNLY	7.79933e-37	1.46033	0.951	0.238	1.13675e-32	γδ-T.1
SPON2	2.25216e-33	1.06528	0.361	0.005	3.28252e-29	γδ-T.1
S1PR5	8.7555e-30	0.944274	0.492	0.024	1.27611e-25	γδ-T.1
PLAC8	4.21546e-27	1.13992	0.607	0.072	6.14403e-23	γδ-T.1
GZMB	1.66641e-25	1.16791	0.902	0.274	2.4288e-21	γδ-T.1
GZMH	6.46326e-24	1.06406	0.902	0.301	9.4202e-20	γδ-T.1
LYN	1.28952e-19	1.16501	0.475	0.061	1.87947e-15	γδ-T.1
UBE2F	1.69969e-19	1.10573	0.525	0.127	2.47731e-15	γδ-T.1
KLRF1	3.726e-18	1.12866	0.393	0.038	5.43065e-14	γδ-T.1
PDGFD	9.67609e-18	1.38743	0.475	0.08	1.41029e-13	γδ-T.1
KLRD1	2.60575e-17	0.865281	0.639	0.145	3.79788e-13	γδ-T.1
BNC2	5.79994e-17	1.10382	0.328	0.024	8.45341e-13	γδ-T.1
FAM53B	1.12663e-16	0.937367	0.672	0.226	1.64206e-12	γδ-T.1
CD247	1.48696e-16	0.8493	0.967	0.693	2.16725e-12	γδ-T.1
TGFBR3	1.43825e-15	1.00324	0.836	0.468	2.09624e-11	γδ-T.1
ZEB2	4.425e-15	0.737218	0.967	0.575	6.44943e-11	γδ-T.1
TMCC3	8.41879e-15	0.94528	0.443	0.068	1.22704e-10	γδ-T.1
RAP2B	2.68452e-14	0.821557	0.656	0.223	3.91268e-10	γδ-T.1
TTC38	6.36829e-14	0.748026	0.279	0.03	9.28178e-10	γδ-T.1
PTPN12	6.46322e-14	0.915795	0.492	0.102	9.42014e-10	γδ-T.1
TFDP2	2.84088e-13	0.885578	0.672	0.217	4.14059e-09	γδ-T.1
KLHDC4	1.31197e-12	0.714208	0.738	0.28	1.9122e-08	γδ-T.1
BCR	2.26064e-12	0.710847	0.541	0.139	3.29488e-08	γδ-T.1
GK5	5.38179e-12	0.834915	0.393	0.073	7.84396e-08	γδ-T.1
AUTS2	2.50092e-11	0.848088	0.803	0.41	3.64509e-07	γδ-T.1
DGKD	5.93145e-11	0.77537	0.59	0.198	8.64509e-07	γδ-T.1
NCAM1	1.46872e-10	0.834369	0.295	0.039	2.14066e-06	γδ-T.1
SGCD	1.95441e-10	0.7688	0.197	0.012	2.84855e-06	γδ-T.1
TYROBP	9.84576e-10	0.710065	0.426	0.105	1.43502e-05	γδ-T.1
DOCK5	1.00734e-09	1.02407	0.41	0.112	1.4682e-05	γδ-T.1
RASA3	1.82281e-09	0.75199	0.689	0.353	2.65675e-05	γδ-T.1
PTPN7	2.11213e-09	0.759318	0.623	0.26	3.07843e-05	γδ-T.1
MYO1F	3.06375e-09	0.732452	0.705	0.398	4.46542e-05	γδ-T.1
B3GNT7	3.35411e-09	0.743341	0.18	0.015	4.88862e-05	γδ-T.1
ITGAL	3.96854e-09	0.742812	0.639	0.282	5.78414e-05	γδ-T.1
MTSS1	7.20943e-09	0.702638	0.328	0.064	0.000105078	γδ-T.1
HAVCR2	9.10706e-09	0.755783	0.377	0.09	0.000132735	γδ-T.1
SSBP3	1.47092e-08	0.712569	0.541	0.203	0.000214387	γδ-T.1
YES1	3.03734e-08	0.943617	0.508	0.197	0.000442693	γδ-T.1
CADM1	3.63293e-08	0.755043	0.525	0.192	0.000529499	γδ-T.1
FOXK2	3.97404e-08	0.767841	0.475	0.176	0.000579217	γδ-T.1
LINGO2	8.15577e-08	1.43196	0.18	0.024	0.0011887	γδ-T.1
IGF1R	1.32767e-05	0.857326	0.213	0.064	0.193507	γδ-T.1
